# Supplementary material for: Glial and neuronal Semaphorin signaling instruct the development of a functional myotopic map for Drosophila walking
Source: eLife. 2016 Feb 29;5:e11572. doi: 10.7554/eLife.11572 (PMC4805548; doi:10.7554/eLife.11572)
Supplement: Figure 1—source data 1. — DOI: http://dx.doi.org/10.7554/eLife.11572.004 [file elife-11572-fig1-data1.xlsx]

## Sheet: Sheet1
Genotype	Walking Phenotype	Numbers
UASdicer;OK371Gal4::UASmCD8GFP (Control)	Normal	N=46/46
Sema1a RNAi	uncoordinated walking activity with leg dragging	N=26/26
Sema1b RNAi	Short steps and leg dragging	N=11/11
Sema2a RNAi	Normal	N=7/11
PlexA RNAi	Uncoordinated walking, short steps or short steps with leg dragging.	N=47/59
PlexB RNAi	short steps and leg dragging	N=23/31
