# Supplementary material for: Glial and neuronal Semaphorin signaling instruct the development of a functional myotopic map for Drosophila walking
Source: eLife. 2016 Feb 29;5:e11572. doi: 10.7554/eLife.11572 (PMC4805548; doi:10.7554/eLife.11572)
Supplement: Figure 3—source data 1. — DOI: http://dx.doi.org/10.7554/eLife.11572.009 [file elife-11572-fig3-data1.xlsx]

## Sheet: Sheet1
A	Proximal Femur	(i) ltm2 nerve does not defasciculate	(i) numbers	(ii) tidm nerve stalls	(ii) numbers	both (i) and (ii)	both (i) and (ii) numbers	total numbers
	OK371Gal4	0	0	0	0	0	0	12
	Sema1a RNAi	0.4	6	0.4	6	0.13	2	15
	PlexARNAi	0.2666	4	0.0333	5	0.006	1	15
B	Distal Tibia	Excess defasciculation and innervation in tadm	numbers	Excess defasciculation and innervation in tarm		total numbers
	OK371Gal4	0	0	0	0	12
	Sema1a RNAi	0.5855	7	0.6666	8	12
	PlexARNAi	0.6666	8	0.5	6	12
C	Proximal Femur	Excess defasciculation and innervation	numbers	total numbers
	OK371Gal4	0	0	13
	Sema1a overexpression	1	7	7
	PlexA overexpression	0.2666	4	15
D	Distal Tibia	Reduced defasciculation and innervation	numbers	total numbers
	OK371Gal4	0	0	13
	Sema1a overexpression	0.75	6	8
	PlexA overexpression	0.6666	10	15
