# Supplementary material for: Glial and neuronal Semaphorin signaling instruct the development of a functional myotopic map for Drosophila walking
Source: eLife. 2016 Feb 29;5:e11572. doi: 10.7554/eLife.11572 (PMC4805548; doi:10.7554/eLife.11572)
Supplement: Figure 4—source data 1. — DOI: http://dx.doi.org/10.7554/eLife.11572.012 [file elife-11572-fig4-data1.xlsx]

## Sheet: Sheet1
Genotype	Normal innervation of Femur (ltm2, tidm)		Ectopic innervation of Tibia (ltm1, tadm)
VNG6341-Gal4 (Control)	1	n=16/16	0.06	n=1/16
Sema1a RNAi	0.25	n=4/16	0.187	n=3/16
PlxA RNAi	0.5	n=6/12	0.3333	n=4/12
Sema1aP2 /Sema1aP2	0.333	n=6/18	0.5	n=9/18
Sema1aP2 /PlexA	0.55	n=11/20	0.25	n=5/20
Sema1aP1 /Sema1aP2	0.5	n=19/38	0.658	n=29/38
